# Supplementary material for: Quantification of mRNA and protein and integration with protein turnover in a bacterium
Source: PubMed Central journal article supplement — Mol Syst Biol. 2011 Jul 19;7:511. doi: 10.1038/msb.2011.38 (PMC3159969; doi:10.1038/msb.2011.38), 2011-07-19
Supplement: msb201138-s5.pdf [file msb201138-s5.pdf]

## Quantification of mRNA and protein and integration with protein turnover in a bacterium

Tobias Maier, Alexander Schmidt, Marc Güell, Sebastian Kühner, Anne-Claude Gavin, Ruedi Aebersold, Luis Serrano

*Corresponding authors: Tobias Maier and Luis Serrano, CRG*

---

### Review timeline:

|                     |             |
|---------------------|-------------|
| Submission date:    | 05 May 2011 |
| Editorial Decision: | 09 May 2011 |
| Revision received:  | 12 May 2011 |
| Accepted:           | 20 May 2011 |

---

No Peer Review Process File available. This manuscript was transferred from another NPG journal to Molecular Systems Biology, and therefore reviewed outside of Molecular Systems Biology's transparent review policy.
